# Supplementary material
Source: MDPI journal article supplement (https://www.mdpi.com/2673-4605/6/1/9)
Supplement: s1 [file s1]

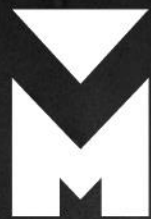

**FLINDERS  
MICROSCOPY AND  
MICROANALYSIS**

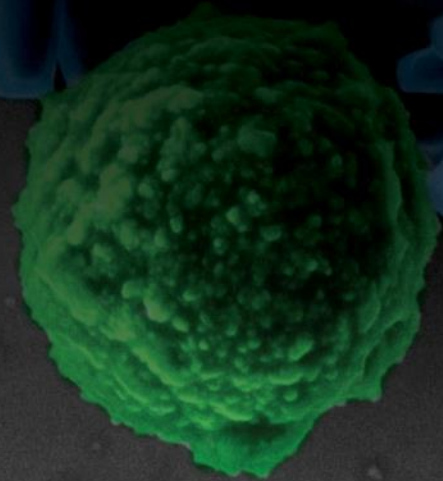



# Microbial Induced Corrosion of 3D printed 316L Stainless Steel by *ferrooxidans*

Presented by Brianna Young

Supervisors: Professor Sarah Harmer & Professor Jamie Quinton

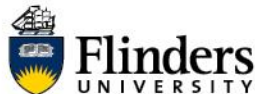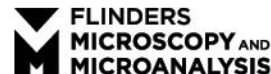

# The Problem

- Global costs of corrosion  $\approx$  \$3.4 trillion annually
- Australia spends \$32 billion a year

## CORROSION DAMAGE BY AREA

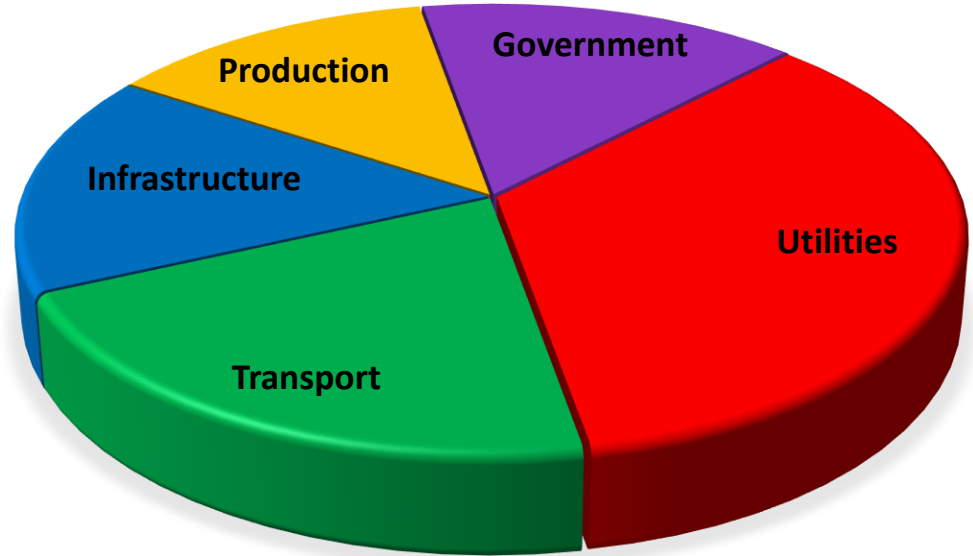

# What Is Corrosion?

- Deterioration of a material and its properties by a chemical or electrochemical reaction between the material and its environment

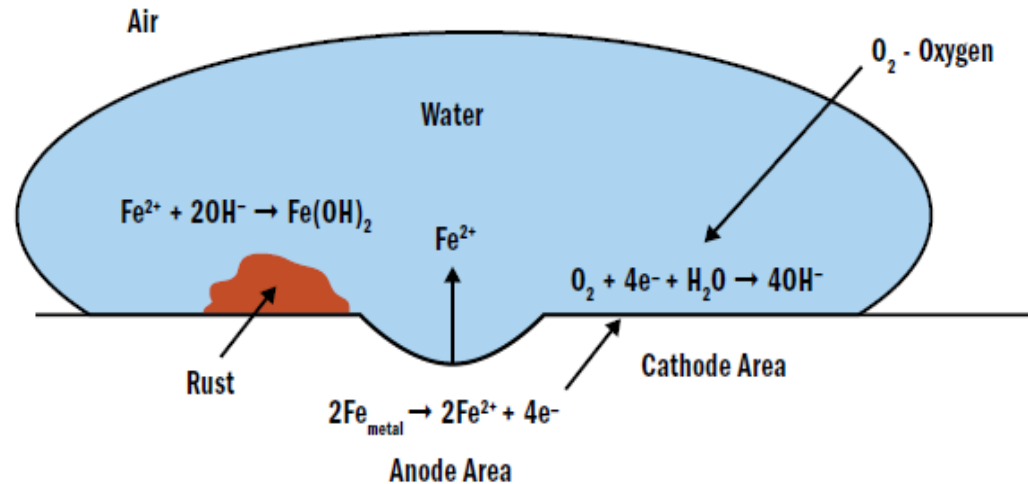

# What Is Corrosion?

- Deterioration of a material and its properties by a chemical or electrochemical reaction between the material and its environment

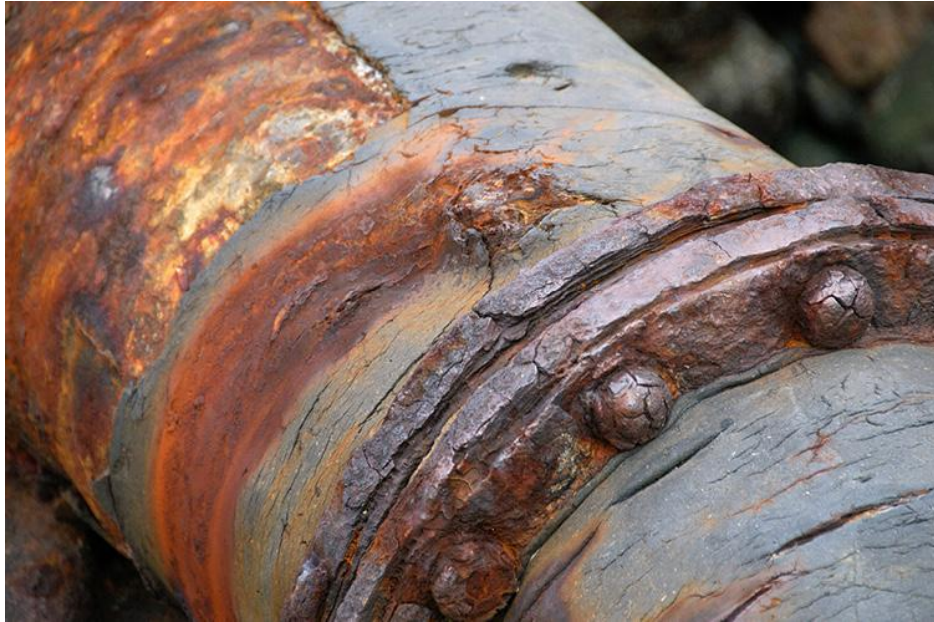

# Microbial Induced Corrosion

- Microorganisms modify the environment
- Electrochemical processes associated with microorganisms
- 20% of total corrosive damage

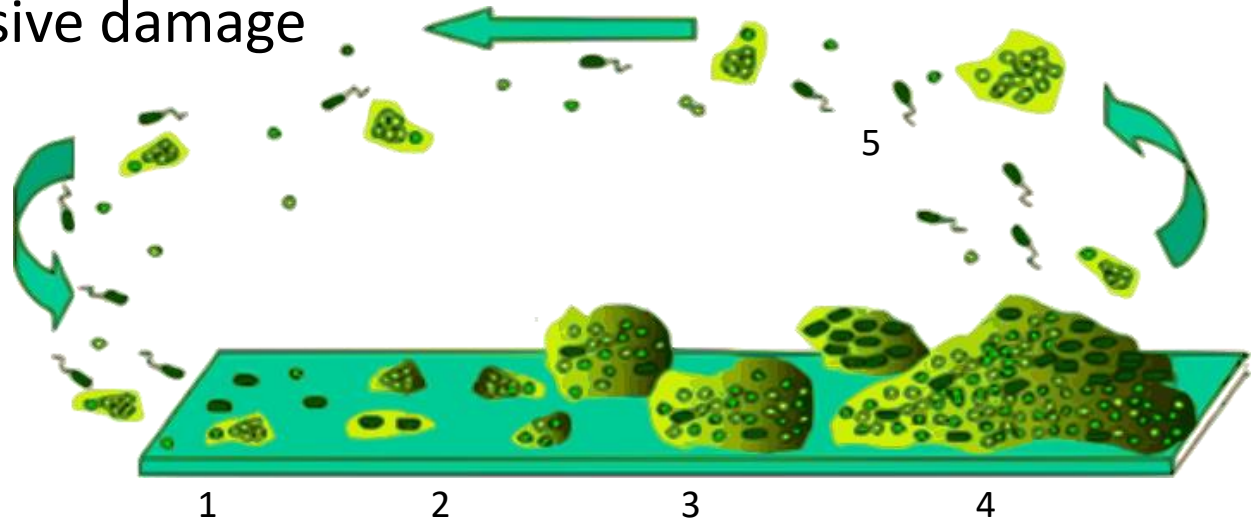



# Bacteria

## *Acidithiobacillus ferrooxidans* (A.f)

- Iron and Sulfur Oxidising
- Acidophilic
- Mesophilic

## *Leptospirillum ferrooxidans* (L.f)

- Iron Oxidising
- Acidophilic
- Mesophilic

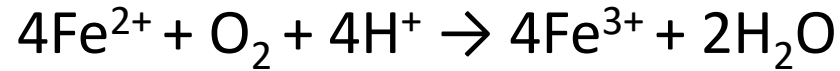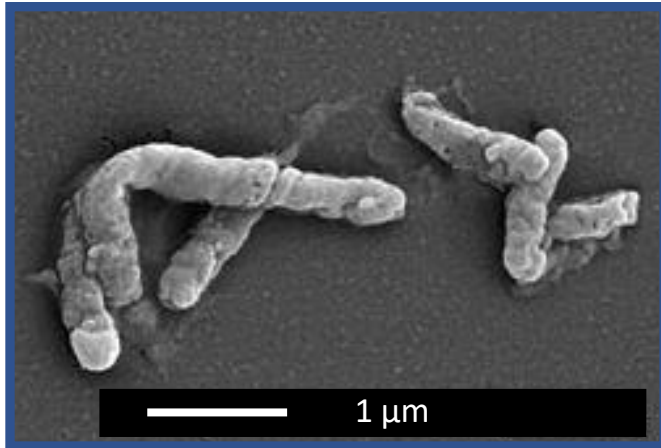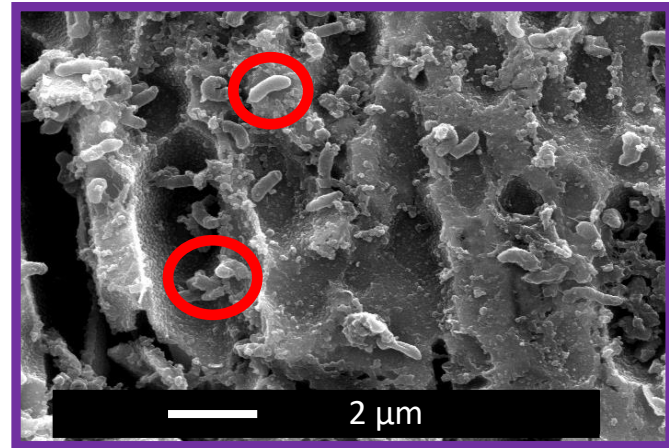

SEM images provided by the Harmer research group

Inaba, Y., Xu, S., Vardner, J., West, A., & Banta, S. (2019). Microbially Influenced Corrosion of Stainless Steel by *Acidithiobacillus ferrooxidans* Supplemented with Pyrite: Importance of Thiosulfate. *Applied and Environmental Microbiology*, 85(21).

doi:10.1128/AEM.01381-19

# *Could additively manufactured stainless steel reduce the costs seen due to corrosion damage?*

- Layer by layer production
  - Gives more control over design
  - Reduces waste
  - Physical properties can be similar
  - Limited research into corrosive properties
- 



# Type 316 Stainless Steel

- Iron alloy,  $\text{FeCr}_{18}\text{Ni}_{10}\text{Mo}_3$
- Austenitic stainless steel
- Resistant to corrosion
  - $\text{Cr}_2\text{O}_3$  passive layer

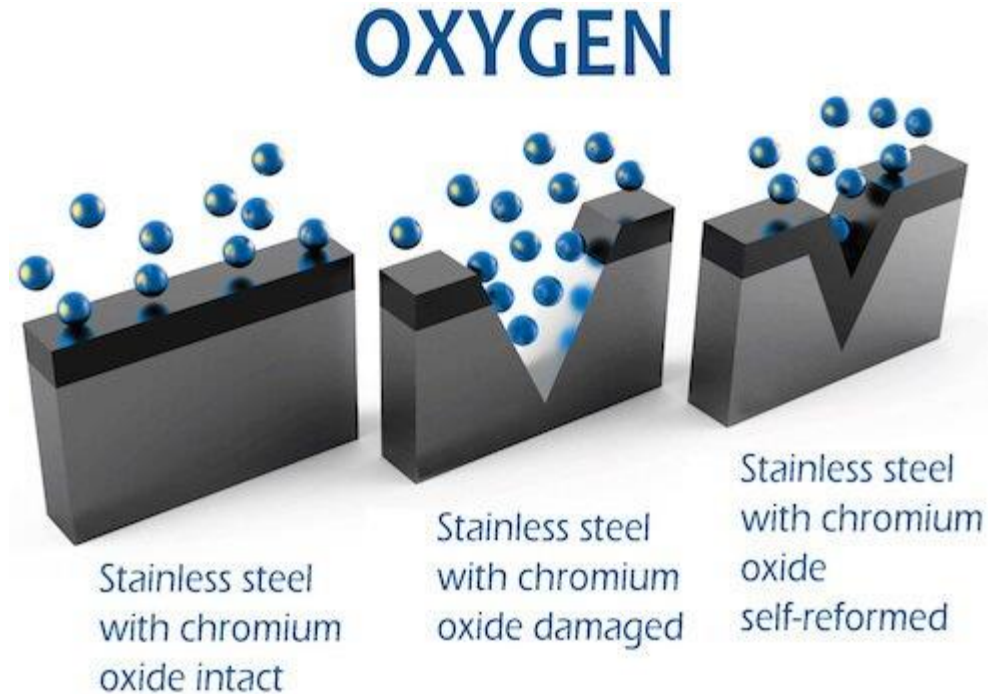

# Laser Metal Deposition

- Material is deposited coaxially with laser beam
- Creates melt pool on substrate
- Solidifies to create layer
- Can create corner parts without bolts or welding

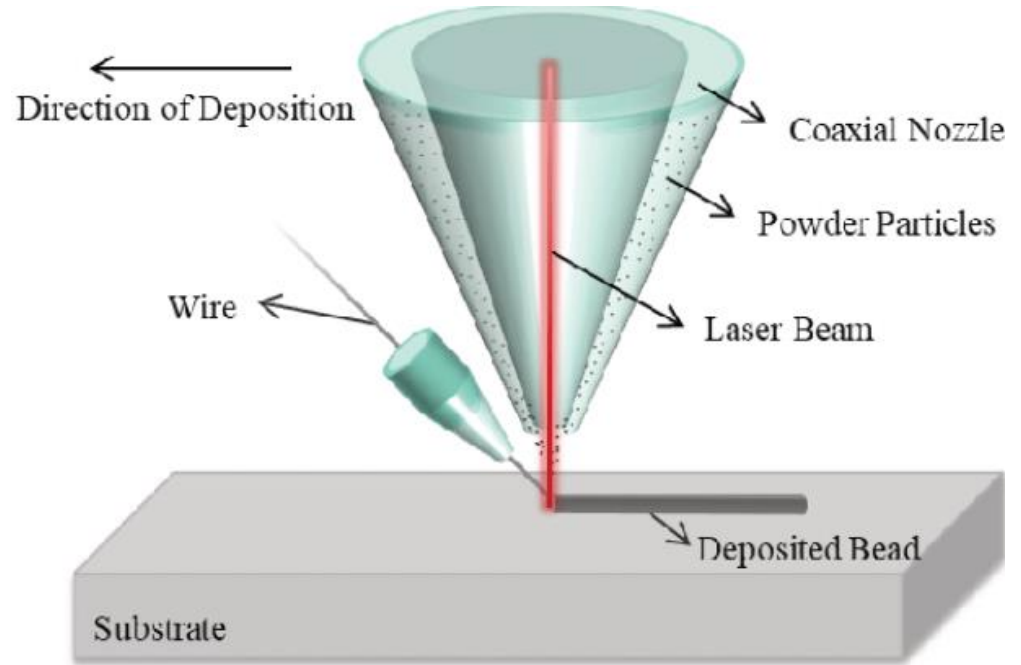

# Project Aims

- Investigate microbial induced corrosion by *A.f* and *L.f* on the surface of 3D printed 316L stainless steel
- Determine if 3D printed 316L stainless steel could be used in conjunction with other materials for underground pipes in acidic soils

# Experimental Design

## 1. Sample preparation

- Cut – 10mm x 10mm x 0.5mm
- Polish –  $R_z < 1\mu\text{m}$
- Clean

## 2. Sample incubation

- Temperature 30°C
- pH 1.8
- Cell concentration  $1.5 \times 10^7 \text{ cells/mL}$

## 3. Sample analysis

- Scanning Electron Microscopy
- Auger Electron Microscopy
- Surface roughness
  - AFM
  - Profilometer

# Results

## Growth of bacteria over period of incubation

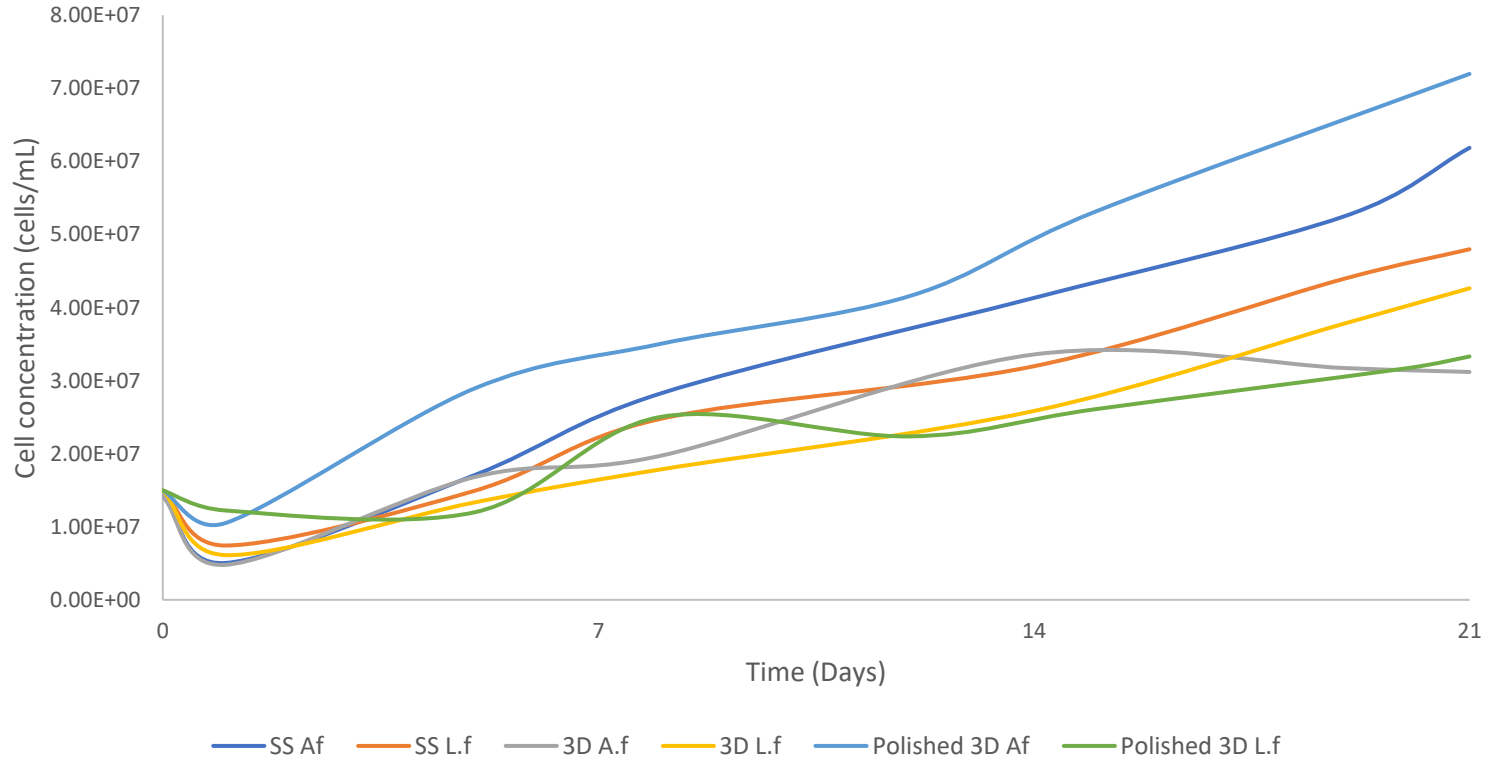

# Polished 3D Printed Stainless Steel

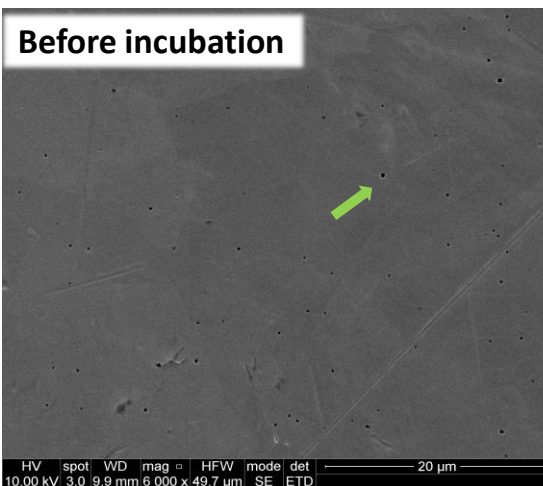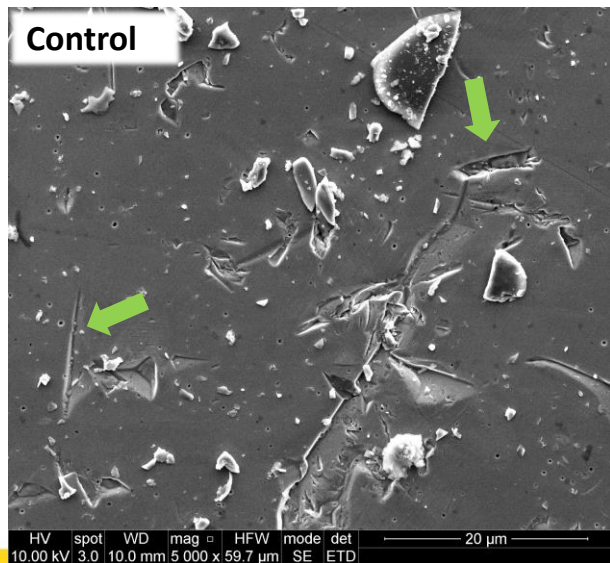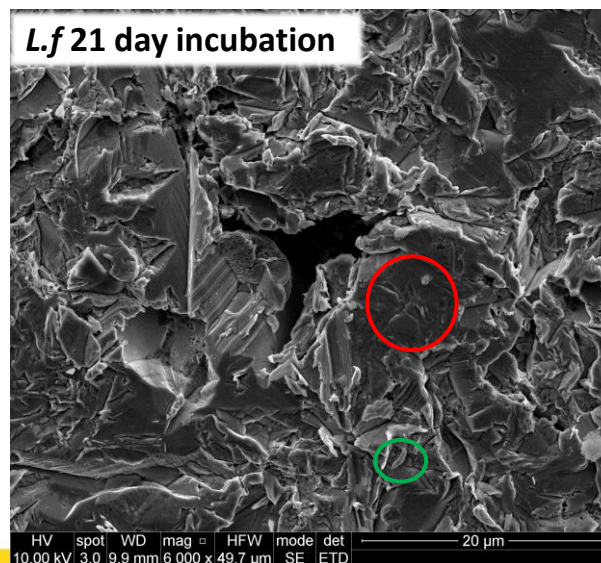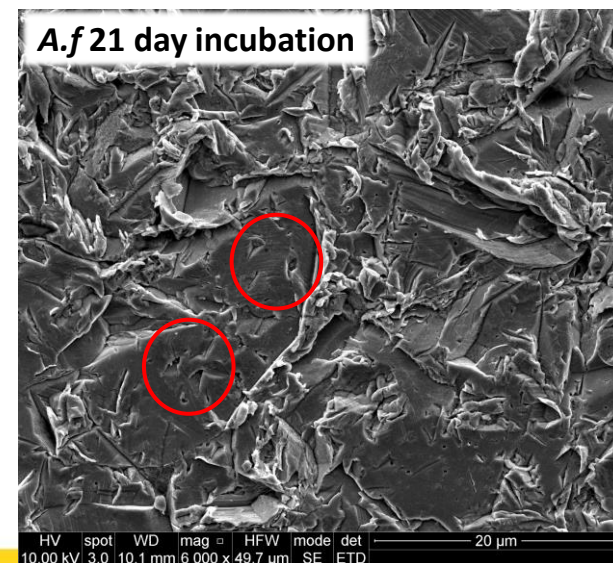

# Polished 3D Printed Stainless Steel – 21 day incubation

- Uniform spread of iron
- Lower intensity of chromium indicates weakness in chromium oxide passive layer

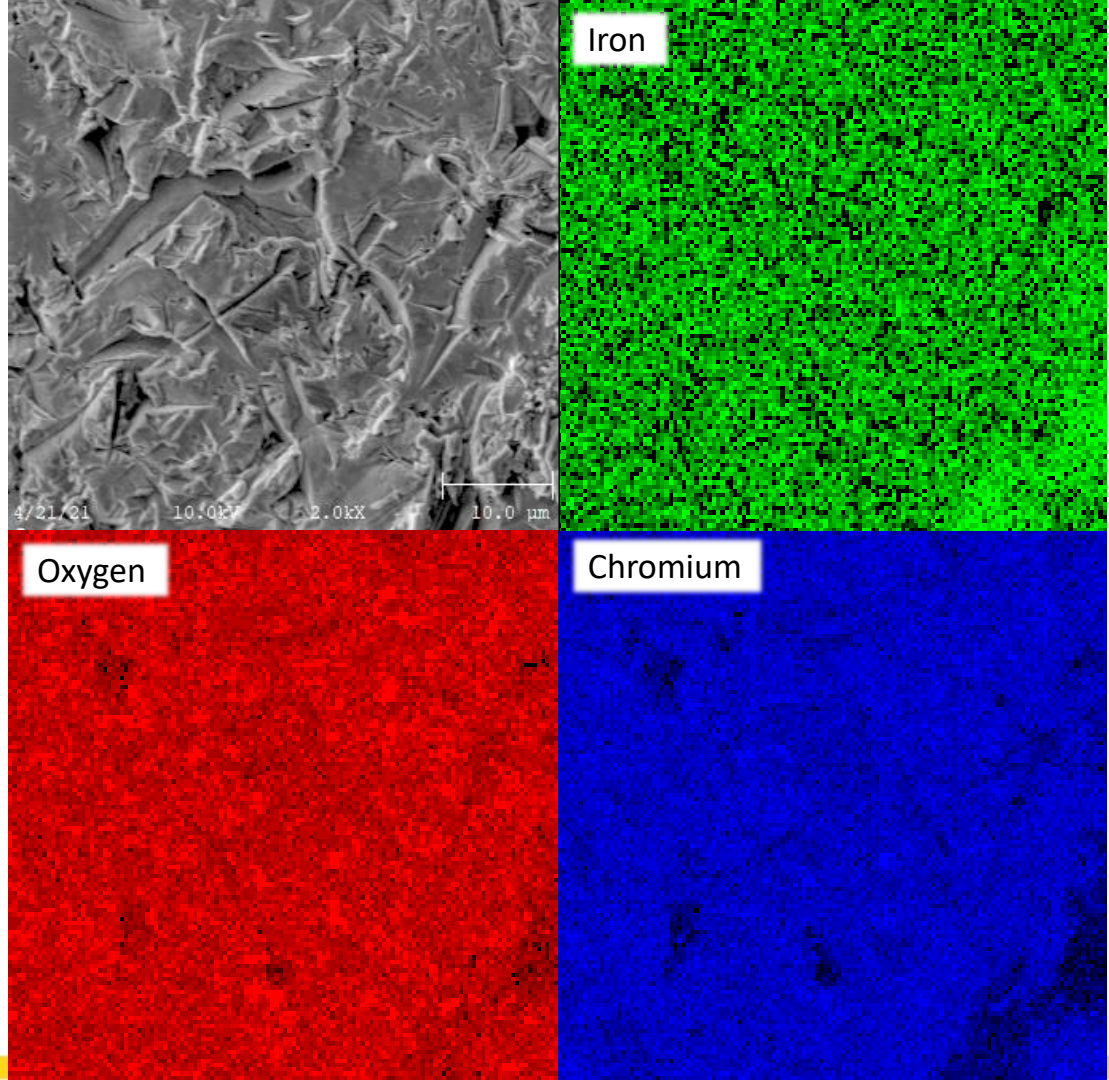



# Unpolished 3D Printed Stainless Steel

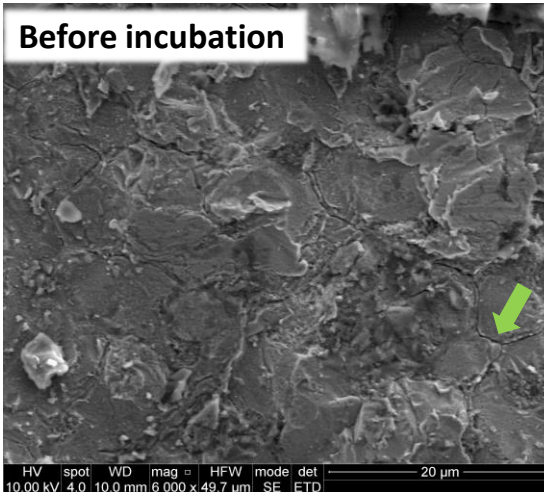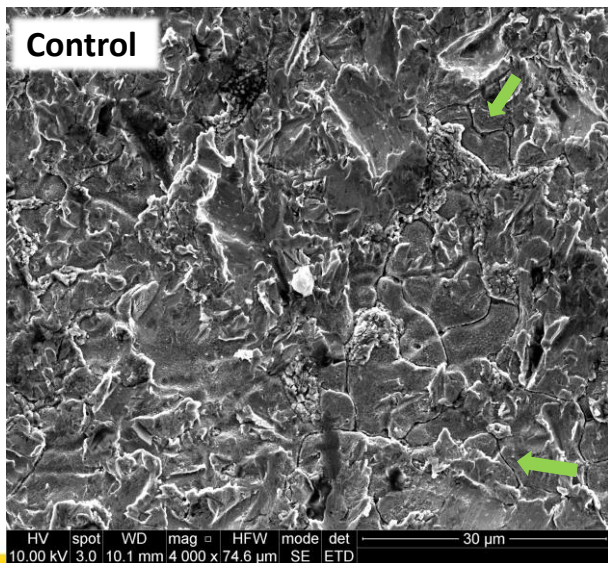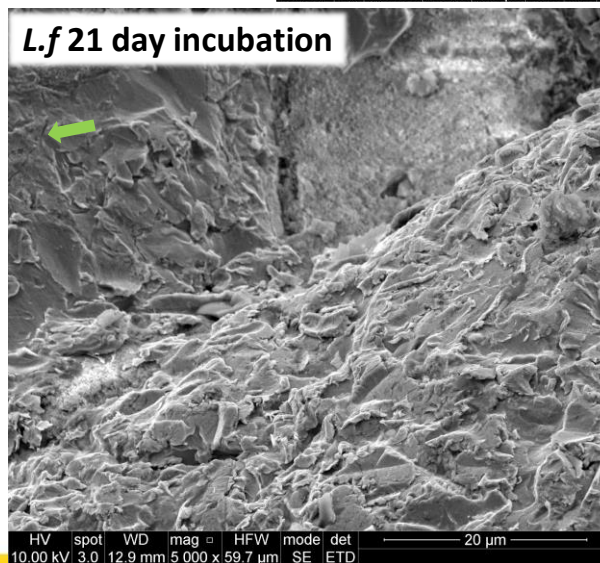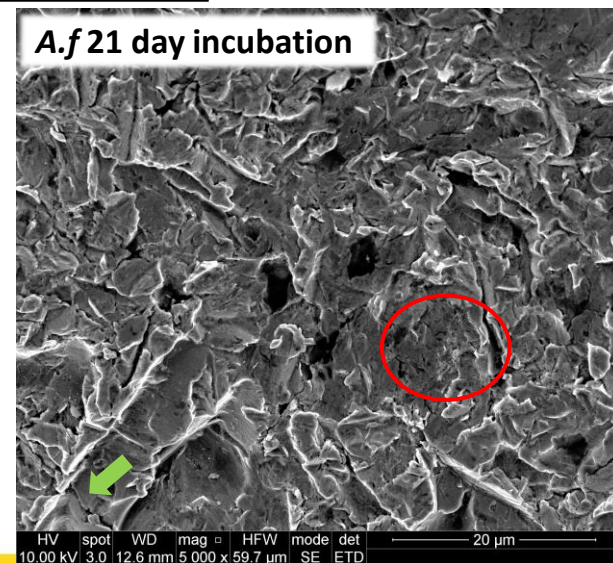

# Unpolished 3D Printed Stainless Steel – 21 day incubation

- Uneven distribution of chromium oxide layer
- Dark spots in oxygen and chromium due to pyrite particles

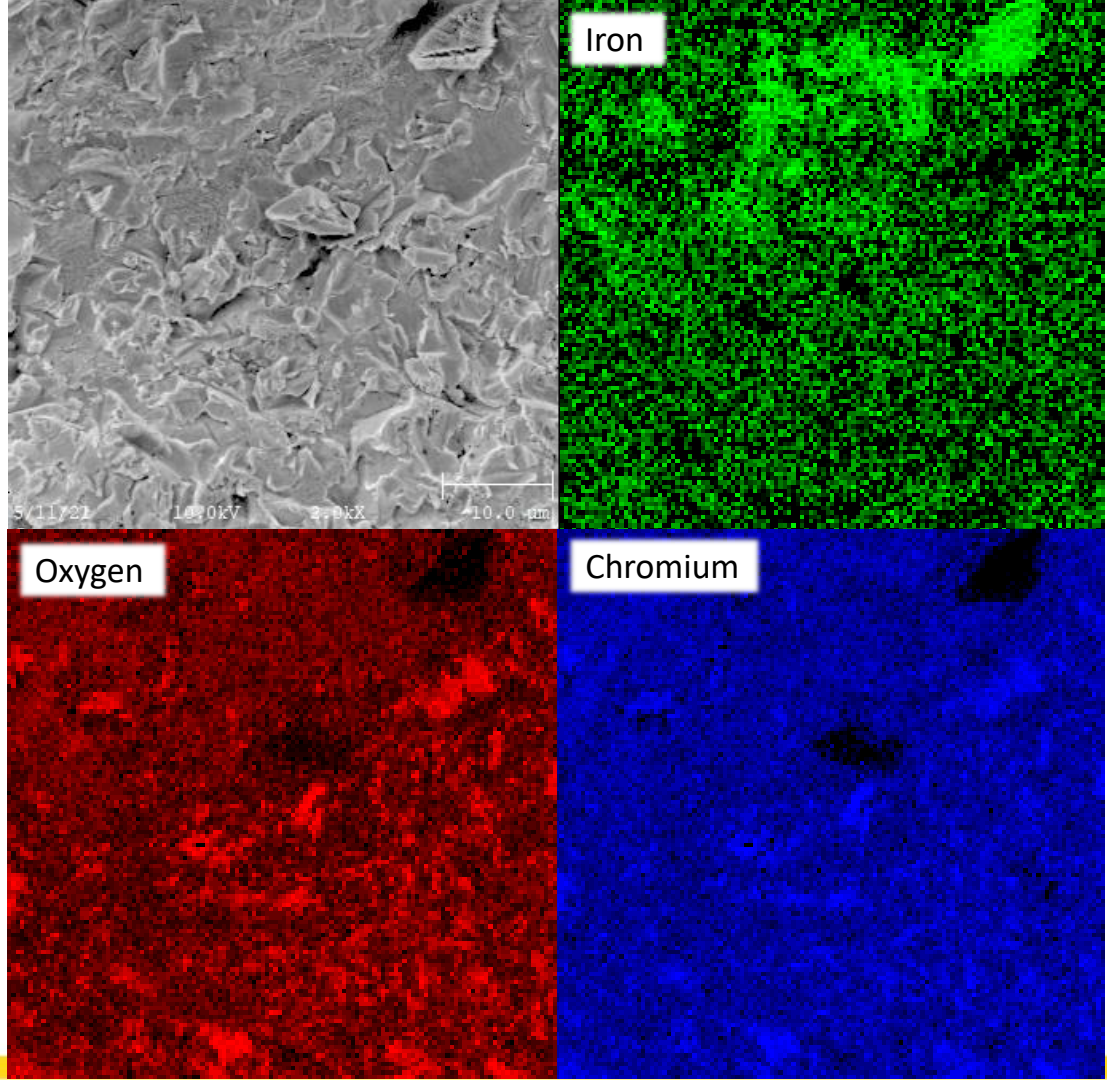



# Traditionally Manufactured Stainless Steel

Before incubation

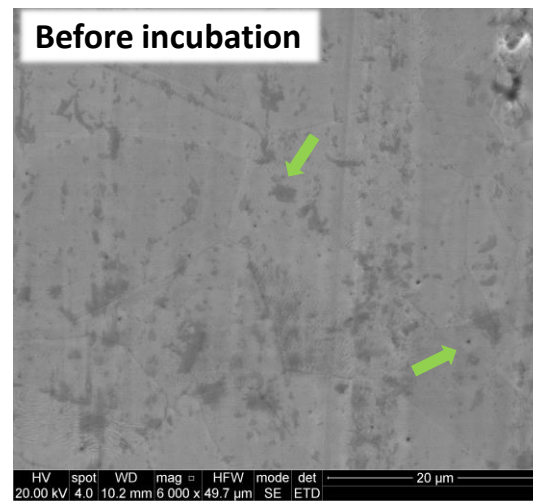

Control

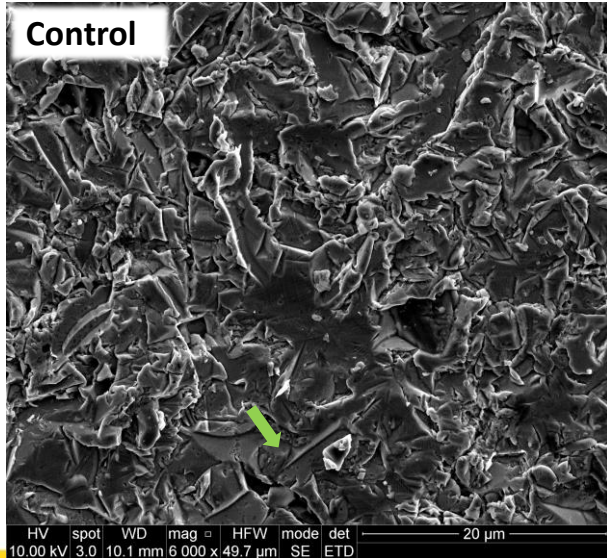

*L.f* 21 day incubation

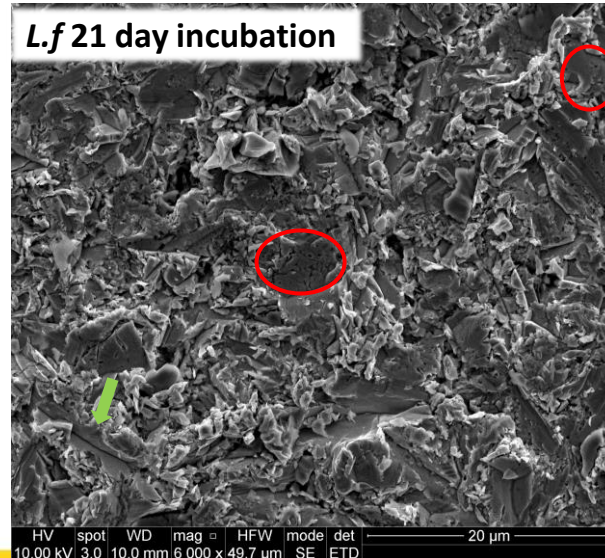

*A.f* 21 day incubation

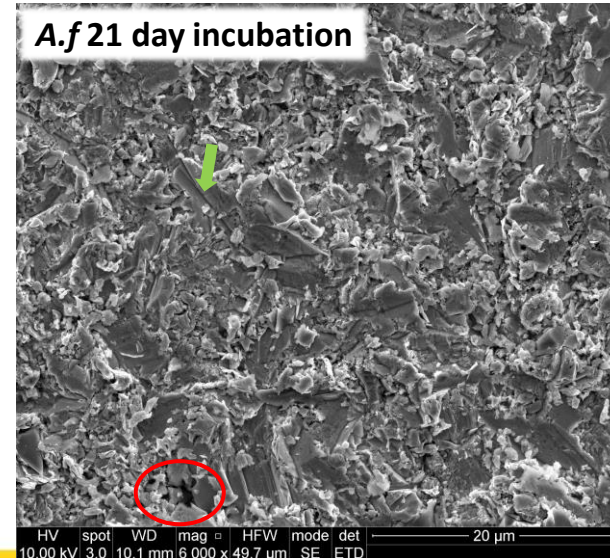

# Traditionally Manufactured Stainless Steel – 21 day incubation

- Potential damage to chromium oxide passive layer
- Higher intensity of iron corresponds to lower intensity of chromium and oxygen

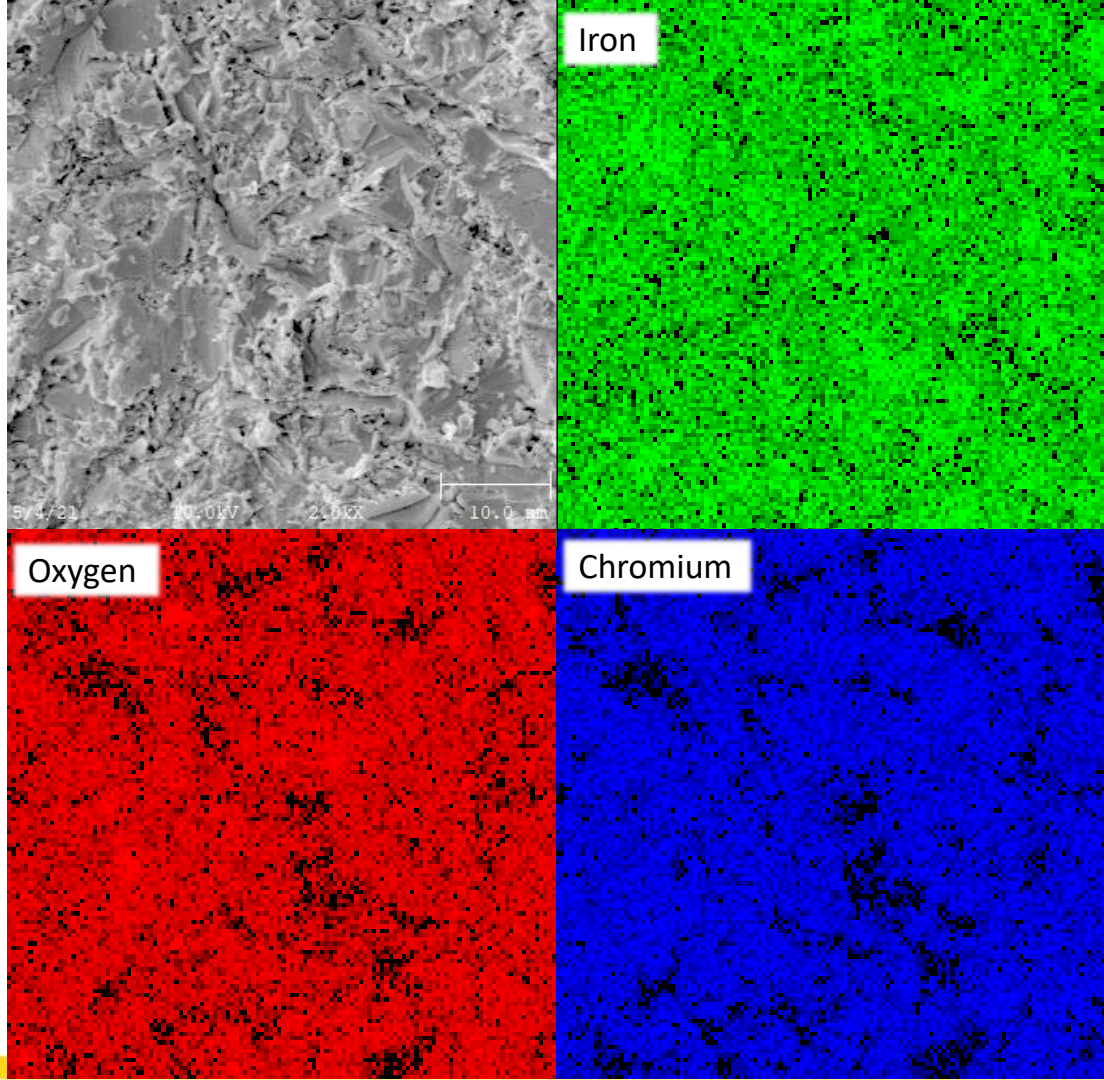

# Mass Loss Analysis

- Complex system affects mass analysis
- Addition of biofilm, bacteria or pyrite could alter mass loss measurements

Mass loss % of SS samples

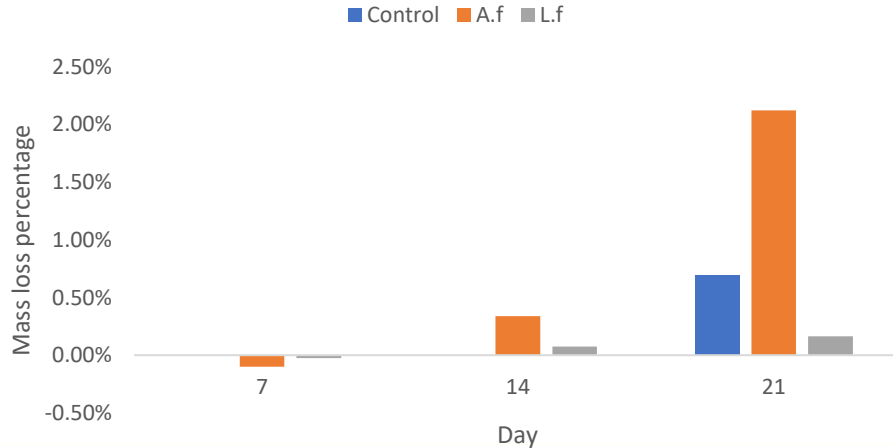

Mass loss % of unpolished 3D samples

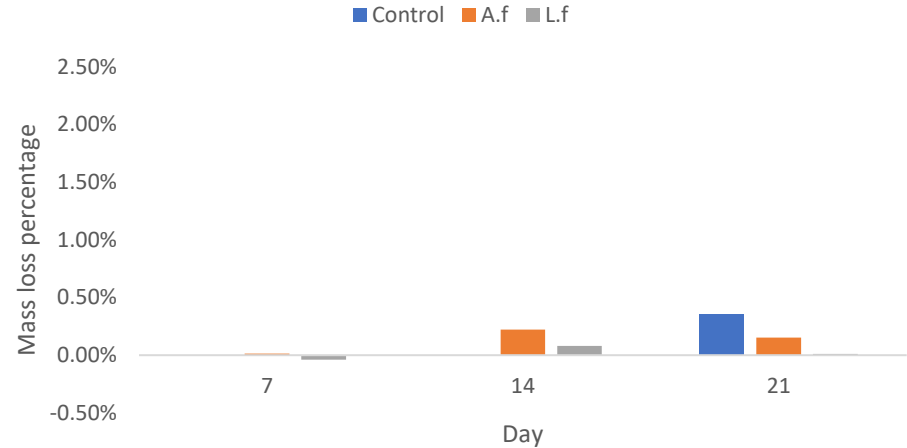

Mass loss % of polished 3D samples

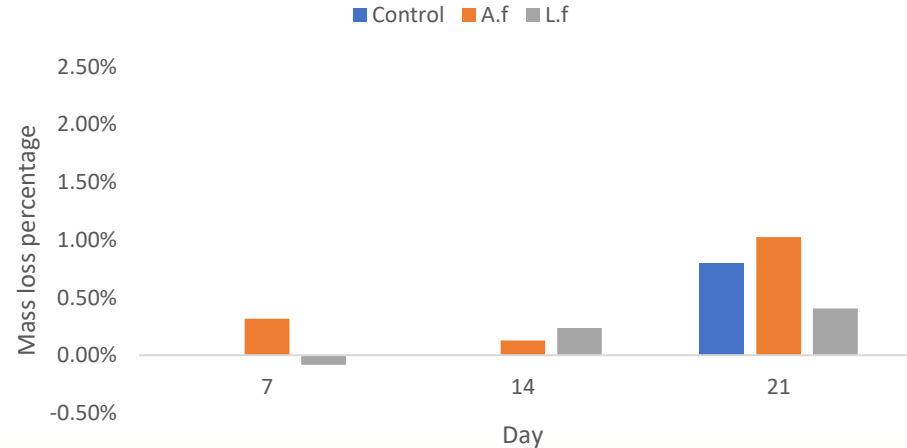

# Conclusions

- Increased growth of *Acidithiobacillus ferrooxidans* and *Leptospirillum ferrooxidans* in all conditions
- Visual change to surface after incubation
- Possible damage to chromium oxide passive layer in traditionally manufactured and polished 3D printed stainless steel

# Future Research

- Repeated experiments with longer periods of incubation
- Expand type of bacteria used
- Explore different additive manufacturing techniques



# Acknowledgements

Prof. Sarah Harmer and Prof. Jamie Quinton

Flinders Microscopy and MicroAnalysis

Dr. Alex Sibley, Dr. Christopher Gibson and Mr. Tim Hodge

Harmer and Quinton research groups at Flinders University

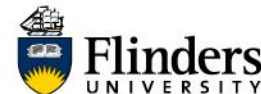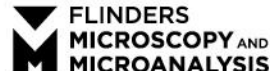

**Thank you for listening**
